# Supplementary material for: Investigating habitat shift in Symphyotrichum subg. Virgulus: A three-way integration of morphology, ecological niche, and phylogenomics
Source: Research Square preprint supplement (doi:10.21203/rs.3.rs-8265704/v1), 2025-12-09
Supplement: Supplementary file 1 [file 42b70c23bad47b523ea92e4c.docx]

TABLES

Table S1A. MANOVA results (*p*-value in relation to the F statistic for every morphometric trait) for *S*. subg. *Virgulus*.

| **Morphological characters** | **Pr(>F) (***S*. subg. *Virgulus*) | **Pr(>F)** (*S.* section *Concolores*) | **Pr(>F)** (*S*. section *Grandiflori*) | **Pr(>F)** (*S*. section *Patentes*) | **Pr(>F)** (*S*. section *polyliguli & ericoidei*) |
| --- | --- | --- | --- | --- | --- |
| Phyllary length | **< 2.2e-16** | **7.914e-07** | **0.0002651** | 0.4956 | **2.978e-08** |
| Phyllary width | **< 2.2e-16** | **8.179e-05** | **0.007555** | 0.1896 | **9.157e-05** |
| Primary axis leaf length | **2.483e-07** | **0.03922** | **2.567e-08** | **0.002303** | 0.2264 |
| Primary axis leaf width | **< 2.2e-16** | **0.01038** | **3.327e-07** | **3.491e-06** | **1.463e-09** |
| Secondary axis leaf length | **< 2.2e-16** | 0.1062 | **4.081e-05** | **6.123e-05** | **4.471e-07** |
| Secondary axis leaf width | **< 2.2e-16** | **0.0252** | **1.164e-05** | **0.000558** | **< 2.2e-16** |
| Bract length | **< 2.2e-16** | **2.49e-05** | **0.0008967** | **0.003136** | **1.727e-06** |
| Bract width | 0.9947 | **4.251e-09** | 0.8742 | **0.00588** | 0.7591 |
| Auricle length | **< 2.2e-16** | n/a | **7.097e-09** | n/a | n/a |
| Primary axis hair length | **< 2.2e-16** | **8.554e-06** | **< 2.2e-16** | 0.0659 | 0.114 |
| Below capitulum hair length | **< 2.2e-16** | **6.145e-07** | **< 2.2e-16** | 0.3063 | **5.109e-08** |
| Ray length | **< 2.2e-16** | **0.003555** | 0.1111 | **0.001219** | **8.644e-11** |
| Ray width | **5.56e-15** | **0.01101** | **0.02555** | 0.1374 | **0.0005933** |

Table S1B. MANOVA results (*p*-value in relation to the F statistic for every environmental variable) for *S*. subg. *Virgulus*.

| **Environmental variables** | **Pr(>F) (***S*. subg. *Virgulus*) | **Pr(>F)** (*S.* section *Concolores*) | **Pr(>F)** (*S*. section *Grandiflori*) | **Pr(>F)** (*S*. section *Patentes*) | **Pr(>F)** (*S*. section *polyliguli & ericoidei*) |
| --- | --- | --- | --- | --- | --- |
| aridity | < 2.2e-16 | < 2.2e-16 | < 2.2e-16 | 1.172e-09 | < 2.2e-16 |
| BIO1 | < 2.2e-16 | < 2.2e-16 | < 2.2e-16 | < 2.2e-16 | < 2.2e-16 |
| BIO10 | < 2.2e-16 | < 2.2e-16 | < 2.2e-16 | < 2.2e-16 | < 2.2e-16 |
| BIO11 | < 2.2e-16 | < 2.2e-16 | < 2.2e-16 | < 2.2e-16 | < 2.2e-16 |
| BIO12 | < 2.2e-16 | < 2.2e-16 | < 2.2e-16 | < 2.2e-16 | < 2.2e-16 |
| BIO13 | < 2.2e-16 | < 2.2e-16 | < 2.2e-16 | < 2.2e-16 | < 2.2e-16 |
| BIO14 | < 2.2e-16 | < 2.2e-16 | < 2.2e-16 | 6.708e-09 | < 2.2e-16 |
| BIO15 | < 2.2e-16 | < 2.2e-16 | < 2.2e-16 | < 2.2e-16 | < 2.2e-16 |
| BIO16 | < 2.2e-16 | < 2.2e-16 | < 2.2e-16 | < 2.2e-16 | < 2.2e-16 |
| BIO17 | < 2.2e-16 | < 2.2e-16 | < 2.2e-16 | 2.855e-06 | < 2.2e-16 |
| BIO18 | < 2.2e-16 | < 2.2e-16 | < 2.2e-16 | < 2.2e-16 | < 2.2e-16 |
| BIO19 | < 2.2e-16 | < 2.2e-16 | < 2.2e-16 | 6.856e-13 | < 2.2e-16 |
| BIO2 | < 2.2e-16 | 0.4863 | < 2.2e-16 | 8.651e-13 | < 2.2e-16 |
| BIO3 | < 2.2e-16 | < 2.2e-16 | < 2.2e-16 | < 2.2e-16 | < 2.2e-16 |
| BIO4 | < 2.2e-16 | < 2.2e-16 | < 2.2e-16 | < 2.2e-16 | < 2.2e-16 |
| BIO5 | < 2.2e-16 | < 2.2e-16 | < 2.2e-16 | < 2.2e-16 | < 2.2e-16 |
| BIO6 | < 2.2e-16 | < 2.2e-16 | < 2.2e-16 | < 2.2e-16 | < 2.2e-16 |
| BIO7 | < 2.2e-16 | < 2.2e-16 | < 2.2e-16 | < 2.2e-16 | < 2.2e-16 |
| BIO8 | < 2.2e-16 | 8.5e-05 | < 2.2e-16 | < 2.2e-16 | < 2.2e-16 |
| BIO9 | < 2.2e-16 | < 2.2e-16 | < 2.2e-16 | < 2.2e-16 | < 2.2e-16 |
| aspect | 0.001506 | 0.3906 | 0.7553 | 0.09033 | 0.000174 |
| elevation | < 2.2e-16 | < 2.2e-16 | < 2.2e-16 | < 2.2e-16 | < 2.2e-16 |
| slope | < 2.2e-16 | 1.012e-07 | < 2.2e-16 | < 2.2e-16 | < 2.2e-16 |
| bulkdensity | < 2.2e-16 | < 2.2e-16 | < 2.2e-16 | 6.444e-13 | < 2.2e-16 |
| clay | < 2.2e-16 | < 2.2e-16 | < 2.2e-16 | < 2.2e-16 | < 2.2e-16 |
| coarsefragment | < 2.2e-16 | 1.576e-05 | < 2.2e-16 | < 2.2e-16 | < 2.2e-16 |
| nitrogen | < 2.2e-16 | 4.453e-14 | < 2.2e-16 | < 2.2e-16 | < 2.2e-16 |
| Ph | < 2.2e-16 | < 2.2e-16 | < 2.2e-16 | 4.876e-13 | < 2.2e-16 |
| sand | < 2.2e-16 | < 2.2e-16 | < 2.2e-16 | < 2.2e-16 | 2.026e-13 |
| Silt | < 2.2e-16 | < 2.2e-16 | < 2.2e-16 | < 2.2e-16 | < 2.2e-16 |
| carbon | < 2.2e-16 | 1.407e-10 | < 2.2e-16 | < 2.2e-16 | < 2.2e-16 |
| needleleaf | < 2.2e-16 | < 2.2e-16 | < 2.2e-16 | < 2.2e-16 | < 2.2e-16 |
| evergreenbroadleaf | < 2.2e-16 | < 2.2e-16 | < 2.2e-16 | < 2.2e-16 | 0.4325 |
| deciduousbroadleaf | < 2.2e-16 | 0.1225 | 9.256e-14 | < 2.2e-16 | < 2.2e-16 |
| mixedtrees | < 2.2e-16 | < 2.2e-16 | < 2.2e-16 | < 2.2e-16 | 0.05707 |
| shrubs | < 2.2e-16 | 0.004291 | < 2.2e-16 | 0.8949 | < 2.2e-16 |
| herbaceous | < 2.2e-16 | < 2.2e-16 | < 2.2e-16 | 0.001027 | < 2.2e-16 |

Table S2A. PairwiseAdonis analysis results of morphometric data for *Symphyotrichum* section *Concolores* (R2 values for pairwise species comparisons).

|  | *S. concolor* | *S. pratense* | *S. sericeum* |
| --- | --- | --- | --- |
| *S. concolor* | – | 0.7600834 | 0.8054851 |
| *S. pratense* | – | – | 0.6165572 |
| *S. sericeum* | – | – | – |

Table S2B. PairwiseAdonis analysis results of morphometric data for *Symphyotrichum* section *Concolores* (*p-*adjusted values for pairwise species comparisons).

|  | *S. concolor* | *S. pratense* | *S. sericeum* |
| --- | --- | --- | --- |
| *S. concolor* | – | 0.00389961 | 0.01219878 |
| *S. pratense* | – | – | 0.01219878 |
| *S. sericeum* | – | – | – |

Table S2C. PairwiseAdonis analysis results of morphometric data for *Symphyotrichum* section *Grandiflori* (R2 values for pairwise species comparisons).

|  | *S. hintonii* | *S. moranense* | *S. oblongifolium* | *S. purpurescens* | *S. turneri* | *S. yukonense* | *S. fendleri* |
| --- | --- | --- | --- | --- | --- | --- | --- |
| *S. hintonii* | – | 0.26150159 | 0.42159015 | 0.09648156 | 0.07637537 | 0.77938419 | 0.66911643 |
| *S. moranense* | – | – | 0.25981962 | 0.23000467 | 0.09286453 | 0.69938718 | 0.57460434 |
| *S. oblongifolium* | – | – | – | 0.05955262 | 0.06544241 | 0.78446422 | 0.57510144 |
| *S. purpurescens* | – | – | – | – | 0.14044092 | 0.52853872 | 0.27957508 |
| *S. turneri* | – | – | – | – | – | 0.31590937 | 0.17113572 |
| *S. yukonense* | – | – | – | – | – | – | 0.71844533 |
| *S. fendleri* | – | – | – | – | – | – | – |

Table S2D. PairwiseAdonis analysis results of morphometric data for *Symphyotrichum* section *Grandiflori* (*p-*adjustedvalues for pairwise species comparisons).

|  | *S. hintonii* | *S. moranense* | *S. oblongifolium* | *S. purpurescens* | *S. turneri* | *S. yukonense* | *S. fendleri* |
| --- | --- | --- | --- | --- | --- | --- | --- |
| *S. hintonii* | – | 0.01049895 | 0.12778722 | 0.28217178 | 0.28217178 | 0.28217178 | 0.28217178 |
| *S. moranense* | – | – | 0.00189981 | 0.00189981 | 0.00719928 | 0.01919808 | 0.01119888 |
| *S. oblongifolium* | – | – | – | 0.28217178 | 0.28217178 | 0.12318768 | 0.12698730 |
| *S. purpurescens* | – | – | – | – | 0.00189981 | 0.00799920 | 0.00799920 |
| *S. turneri* | – | – | – | – | – | 0.01429857 | 0.28217178 |
| *S. yukonense* | – | – | – | – | – | – | 0.28217178 |
| *S. fendleri* | – | – | – | – | – | – | – |

Table S2E. PairwiseAdonis analysis results of morphometric data for *Symphyotrichum* section *Patentes* (R2 values for pairwise species comparisons).

|  | *S. adnatum* | *S. patens* | *S. walteri* |
| --- | --- | --- | --- |
| *S. adnatum* | – | 0.4906737 | 0.4212831 |
| *S. patens* | – | – | 0.5412130 |
| *S. walteri* | – | – | – |

Table S2F. PairwiseAdonis analysis results of morphometric data for *Symphyotrichum* section *Patentes* (*p-*adjusted values for pairwise species comparisons).

|  | *S. adnatum* | *S. patens* | *S. walteri* |
| --- | --- | --- | --- |
| *S. adnatum* | – | 0.00659934 | 0.02379762 |
| *S. patens* | – | – |  |
| *S. walteri* | – | – | – |

Table S2G. PairwiseAdonis analysis results of morphometric data for *Symphyotrichum* section *Polyliguli* and *Symphyotrichum* section *Ericoidei* (R2 values for pairwise species comparisons).

|  | *S. ericoides* | *S. falcatum* | *S. novae-angliae* | *S. amethystinum* |
| --- | --- | --- | --- | --- |
| *S. ericoides* | – | 0.06609103 | 0.28314118 | 0.08009328 |
| *S. falcatum* | – | – | 0.56937616 | 0.24065541 |
| *S. novae-angliae* | – | – | – | 0.55472534 |
| *S. amethystinum* | – | – | – | – |

Table S2H. PairwiseAdonis analysis results of morphometric data for *Symphyotrichum* section *Polyliguli* and *Symphyotrichum* section *Ericoidei* (*p-*adjusted values for pairwise species comparisons).

|  | *S. ericoides* | *S. falcatum* | *S. novae-angliae* | *S. amethystinum* |
| --- | --- | --- | --- | --- |
| *S. ericoides* | – | 0.00439956 | 0.00039996 | 0.25647435 |
| *S. falcatum* | – | – | 0.00039996 | 0.00039996 |
| *S. novae-angliae* | – | – | – | 0.00439956 |
| *S. amethystinum* | – | – | – | – |

Table S3A. PairwiseAdonis analysis results of environmental data for *Symphyotrichum* section *Concolores* (R2 values for pairwise species comparisons).

|  | *S. concolor* | *S. pratense* | *S. sericeum* |
| --- | --- | --- | --- |
| *S. concolor* | – | 0.1260149 | 0.4420508 |
| *S. pratense* | – | – | 0.3784899 |
| *S. sericeum* | – | – | – |

Table S3B. PairwiseAdonis analysis results of environmental data for *Symphyotrichum* section *Concolores* (*p-*adjusted values for pairwise species comparisons).

|  | *S. concolor* | *S. pratense* | *S. sericeum* |
| --- | --- | --- | --- |
| *S. concolor* | – | 9.999e-05 | 9.999e-05 |
| *S. pratense* | – | – | 9.999e-05 |
| *S. sericeum* | – | – | – |

Table S3C. PairwiseAdonis analysis results of environmental data for *Symphyotrichum* section *Grandiflori* (R2 values for pairwise species comparisons).

|  | *S. hintonii* | *S. moranense* | *S. oblongifolium* | *S. grandiflorum* | *S. turneri* | *S. yukonense* | *S. fendleri* |
| --- | --- | --- | --- | --- | --- | --- | --- |
| *S. hintonii* | – | 0.023798015 | 0.039405274 | 0.577095004 | 0.582130462 | 0.716750009 | 0.304224017 |
| *S. moranense* | – | – | 0.443834292 | 0.505461466 | 0.006077885 | 0.325304904 | 0.556220009 |
| *S. oblongifolium* | – | – | – | 0.100220439 | 0.008010827 | 0.076421482 | 0.080538070 |
| *S. grandiflorum* | – | – | – | – | 0.296311631 | 0.752177940 | 0.588318733 |
| *S. turneri* | – | – | – | – | – | 0.473202384 | 0.069893151 |
| *S. yukonense* | – | – | – | – | – | – | 0.428854020 |
| *S. fendleri* | – | – | – | – | – | – | – |

Table S3D. PairwiseAdonis analysis results of environmental data for *Symphyotrichum* section *Grandiflori* (*p-*adjustedvalues for pairwise species comparisons).

|  | *S. hintonii* | *S. moranense* | *S. oblongifolium* | *S. grandiflorum* | *S. turneri* | *S. yukonense* | *S. fendleri* |
| --- | --- | --- | --- | --- | --- | --- | --- |
| *S. hintonii* | – | 0.07759224 | 0.00109989 | 0.00809919 | 0.66666667 | 0.07759224 | 0.00299970 |
| *S. moranense* | – | – | 0.00109989 | 0.00109989 | 0.66666667 | 0.00109989 | 0.00109989 |
| *S. oblongifolium* | – | – | – | 0.00109989 | 0.00879912 | 0.00109989 | 0.00109989 |
| *S. grandiflorum* | – | – | – | – | 0.07759224 | 0.00109989 | 0.00109989 |
| *S. turneri* | – | – | – | – | – | 0.25977402 | 0.28217178 |
| *S. yukonense* | – | – | – | – | – | – | 0.00109989 |
| *S. fendleri* | – | – | – | – | – | – | – |

Table S3E. PairwiseAdonis analysis results of environmental data for *Symphyotrichum* section *Patentes* (R2 values for pairwise species comparisons).

|  | *S. adnatum* | *S. georgianum* | *S. patens* | *S. phlogifolium* | *S. walteri* |
| --- | --- | --- | --- | --- | --- |
| *S. adnatum* | – | 0.144084683 | 0.179001168 | 0.423456195 | 0.044844927 |
| *S. georgianum* | – | – | 0.006946438 | 0.264873766 | 0.186735248 |
| *S. patens* | – | – | – | 0.031140756 | 0.143240422 |
| *S. phlogifolium* | – | – | – | – | 0.465092131 |
| *S. walteri* | – | – | – | – | – |

Table S3F. PairwiseAdonis analysis results of environmental data for *Symphyotrichum* section *Patentes* (*p-*adjusted values for pairwise species comparisons).

|  | *S. adnatum* | *S. georgianum* | *S. patens* | *S. phlogifolium* | *S. walteri* |
| --- | --- | --- | --- | --- | --- |
| *S. adnatum* | – | 9.999e-05 | 9.999e-05 | 9.999e-05 | 9.999e-05 |
| *S. georgianum* | – | – | 9.999e-05 | 9.999e-05 | 9.999e-05 |
| *S. patens* | – | – | – | 9.999e-05 | 9.999e-05 |
| *S. phlogifolium* | – | – | – | – | 9.999e-05 |
| *S. walteri* | – | – | – | – | – |

Table S3G. PairwiseAdonis analysis results of environmental data for *Symphyotrichum* section *Polyliguli* and *Symphyotrichum* section *Ericoidei* (R2 values for pairwise species comparisons).

|  | *S. ericoides* | *S. falcatum* | *S. novae-angliae* | *S. amethystinum* |
| --- | --- | --- | --- | --- |
| *S. ericoides* | – | 0.05707134 | 0.28279730 | 0.08033033 |
| *S. falcatum* | – | – | 0.58579744 | 0.27562247 |
| *S. novae-angliae* | – | – | – | 0.55365378 |
| *S. amethystinum* | – | – | – | – |

Table S3H. PairwiseAdonis analysis results of environmental data for *Symphyotrichum* section *Polyliguli* and *Symphyotrichum* section *Ericoidei* (*p-*adjusted values for pairwise species comparisons).

|  | *S. ericoides* | *S. falcatum* | *S. novae-angliae* | *S. amethystinum* |
| --- | --- | --- | --- | --- |
| *S. ericoides* | – | 0.03359664 | 0.00049995 | 0.25467453 |
| *S. falcatum* | – | – | 0.00049995 | 0.00119988 |
| *S. novae-angliae* | – | – | – | 0.00719928 |
| *S. amethystinum* | – | – | – | – |

Table S4. Phylogenetic signal tests for morphological traits based on Pagel's lambda (λ) and Blomberg's K statistics.

| **Morphological characters** | λ | logL(λ = 1) | logL(λ=0) | *p-*value | K | *p-*value |
| --- | --- | --- | --- | --- | --- | --- |
| Phyllary length | 6.91842e-05 | -28.1718 | -0.000551729 | 1 | 0.122208 | 0.978979 |
| Phyllary width | 0.438888 | -29.6993 | 1.45614 | 0.227545 | 0.201867 | 0.6997 |
| Primary axis leaf length | 0.900619 | 0.388429 | 4.57058 | **0.0325256** | 0.787218 | **0.014014** |
| Primary axis leaf width | 0.861174 | 2.2444 | 2.36697 | 0.123928 | 0.612217 | **0.044044** |
| Secondary axis leaf length | 1.02365 | -11.1791 | 5.23699 | **0.0221115** | 0.814883 | **0.00800801** |
| Secondary axis leaf width | 1.04048 | -22.7573 | 6.64707 | **0.00993188** | 0.760069 | **0.03003** |
| Bract length | 0.952375 | -21.1416 | 3.61656 | 0.0572069 | 0.67553 | 0.0590591 |
| Bract width | 6.91842e-05 | -28.507 | -0.000499837 | 1 | 0.223524 | 0.675676 |
| Auricle length | 6.91842e-05 | -1.48176 | -0.000442891 | 1 | 0.519789 | 0.3003 |
| Primary axis hair length | 6.91842e-05 | -24.976 | -0.000273849 | 1 | 0.26926 | 0.565566 |
| Below capitulum hair length | 0.92385 | -24.5646 | 6.37743 | **0.0115581** | 1.01739 | **0.00800801** |
| Ray length | 0.0405893 | -22.9538 | 0.0116596 | 0.914012 | 0.19837 | 0.774775 |
| Ray width | 0.234517 | -23.2325 | 1.07971 | 0.298762 | 0.161568 | 0.906907 |

Table S5A. Model choice via corrected Akaike information criterion (AICc); the model set included Brownian motion (BM), Ornstein‐Uhlenbeck (OU), and early‐burst (EB) models for quantitative morphological variables.

| Variable | BM | OU | EB |
| --- | --- | --- | --- |
| Phyllary length | **87.82029** | 90.39124 | 90.73457 |
| Phyllary width | **83.61934** | 86.20271 | 86.53362 |
| Primary axis leaf length | **6.796582** | 9.583186 | 9.710866 |
| Primary axis leaf width | **-1.958426** | 0.8296129 | 0.9558596 |
| Secondary axis leaf length | **25.1184** | 27.99946 | 28.03269 |
| Secondary axis leaf width | **51.045** | 53.91642 | 53.95928 |
| Bract length | **46.07162** | 48.87887 | 48.98591 |
| Bract width | **78.90558** | 81.52195 | 81.81986 |
| Auricle length | **23.22557** | 25.84156 | 26.13985 |
| Primary axis hair length | **67.76012** | 70.40199 | 70.67441 |
| Below capitulum hair length | **57.22541** | 60.10152 | 60.1397 |
| Ray length | **72.65405** | 75.23521 | 75.56834 |
| Ray width | **76.38926** | 78.9531 | 79.30355 |

Table S5B. Model choice via corrected Akaike information criterion (AICc); the model set included Brownian motion (BM), Ornstein‐Uhlenbeck (OU), and early‐burst (EB) models for quantitative environmental variables.

| Variable | BM | OU | EB |
| --- | --- | --- | --- |
| BIO 1 | **189.3046** | 192.1535 | 192.3815 |
| BIO 2 | **166.0896** | 168.8643 | 169.1665 |
| BIO 3 | **142.7144** | 145.4797 | 145.7913 |
| BIO 4 | **311.1496** | 313.9999 | 314.2265 |
| BIO 5 | **187.4141** | 190.2576 | 190.491 |
| BIO 6 | **201.7885** | 204.6231 | 204.8654 |
| BIO 7 | **202.0712** | 204.9022 | 205.1482 |
| BIO 8 | **172.0393** | 174.9701 | 175.1162 |
| BIO 9 | **210.0452** | 212.8213 | 213.1221 |
| BIO 10 | **180.7859** | 183.6648 | 183.8628 |
| BIO 11 | **201.6866** | 204.5224 | 204.7636 |
| BIO 12 | **247.6141** | 250.4354 | 250.691 |
| BIO 13 | **191.8843** | 194.6583 | 194.9612 |
| BIO 14 | **157.276** | 160.1226 | 160.3529 |
| BIO 15 | **152.2101** | 155.0225 | 155.287 |
| BIO16 | **225.4985** | 228.2704 | 228.5755 |
| BIO 17 | **196.2255** | 199.0778 | 199.3024 |
| BIO 18 | **198.3169** | 201.2617 | 201.3939 |
| BIO 19 | **203.8503** | 206.6888 | 206.9272 |
| aspect | **179.0148** | 181.7628 | 182.0918 |
| slope | **74.25769** | 77.05181 | 77.33461 |
| elevation | **257.4204** | 260.275 | 260.4973 |
| bulkdensity | **234.3614** | 237.1953 | 237.4383 |
| clay | **123.8125** | 126.6102 | 126.8894 |
| nitrogen | **205.5191** | 208.4304 | 208.596 |
| pH | **139.3555** | 142.1482 | 142.4324 |
| carbon | **151.1134** | 154.0445 | 154.1903 |
| coarsefragment | **100.3168** | 103.1965 | 103.3937 |
| deciduousbroadleaf | **108.3962** | 111.4623 | 111.4731 |
| evergreenbroadleaf | **67.42075** | 70.45549 | 70.49768 |
| mixedtrees | **138.6395** | 141.4356 | 141.7164 |
| shrubs | **104.4159** | 107.3906 | 107.4928 |
| herbaceous | **129.7418** | 132.802 | 132.8187 |
| needleleaf | **127.4132** | 130.255 | 130.4901 |
| sand | **129.089** | 132.0077 | 132.1659 |
| silt | **123.2557** | 126.1127 | 126.3326 |

Table S6. Phylogenetic signal tests for environmental variables based on Pagel's lambda (λ) and Blomberg's K-statistics.

| Variable | λ | logL(λ = 1) | logL(λ=0) | *p-value* | K | *p-value* |
| --- | --- | --- | --- | --- | --- | --- |
| BIO 1 | 0.615789 | -87.0753 | 1.80469 | 0.179146 | 0.380148 | 0.346 |
| BIO 2 | 6.91842e-05 | -72.0619 | -0.000490142 | 1 | 0.206788 | 0.788 |
| BIO 3 | 6.91842e-05 | -60.0283 | -0.000455216 | 1 | 0.210603 | 0.737 |
| BIO 4 | 0.814691 | -151.545 | 0.950379 | 0.329623 | 0.598826 | 0.074 |
| BIO 5 | 0.504667 | -87.9985 | 1.60836 | 0.204722 | 0.436505 | 0.269 |
| BIO 6 | 0.591183 | -93.9425 | 0.274254 | 0.600492 | 0.401885 | 0.264 |
| BIO 7 | 0.0930111 | -96.3015 | 0.00698006 | 0.933417 | 0.50559 | 0.132 |
| BIO 8 | 0.756533 | -82.1542 | 4.46596 | **0.0345766** | 0.657122 | **0.035** |
| BIO 9 | 4.43147e-05 | -94.4264 | -8.93251e-05 | 1 | 0.231149 | 0.709 |
| BIO 10 | 0.708018 | -85.2292 | 3.92152 | **0.0476716** | 0.540053 | 0.126 |
| BIO 11 | 0.582642 | -93.7272 | 0.343797 | 0.557646 | 0.391314 | 0.267 |
| BIO 12 | 0.326383 | -115.918 | 0.475003 | 0.490694 | 0.31516 | 0.456 |
| BIO 13 | 6.91842e-05 | -85.0233 | -0.000408953 | 1 | 0.219832 | 0.706 |
| BIO 14 | 0.697441 | -72.4796 | 2.65626 | 0.103143 | 0.441359 | 0.166 |
| BIO 15 | 0.255896 | -69.6329 | 0.206738 | 0.649337 | 0.371358 | 0.374 |
| BIO 16 | 6.91842e-05 | -101.618 | -0.000438014 | 1 | 0.214222 | 0.752 |
| BIO 17 | 0.712848 | -92.0406 | 3.05112 | 0.0806815 | 0.457158 | 0.15 |
| BIO 18 | 0.78931 | -95.251 | 5.33647 | **0.0208838** | 0.690483 | **0.038** |
| BIO 19 | 0.671483 | -95.0711 | 2.92614 | 0.0871558 | 0.411296 | 0.208 |
| aspect | 6.91842e-05 | -77.6588 | -2.39967e-05 | 1 | 0.192061 | 0.709 |
| slope | 0.19396 | -29.0597 | 0.240761 | 0.623657 | 0.298301 | 0.47 |
| elevation | 0.645283 | -124.288 | 3.3052 | 0.0690608 | 0.591437 | 0.075 |
| bulkdensity | 0.428711 | -111.851 | 1.0393 | 0.307984 | 0.442877 | 0.25 |
| clay | 0.288714 | -54.0766 | 0.659544 | 0.416721 | 0.350844 | 0.452 |
| nitrogen | 0.783544 | -97.8172 | 3.44623 | 0.0633962 | 0.543983 | 0.134 |
| pH | 6.91842e-05 | -60.8977 | -0.000475416 | 1 | 0.277941 | 0.563 |
| carbon | 0.82023 | -71.2568 | 3.81364 | 0.0508368 | 0.705913 | **0.03** |
| coarsefragment | 0.723848 | -46.2739 | 3.10051 | 0.0782676 | 0.603902 | 0.101 |
| deciduousbroadleaf | 1.03641 | -51.3738 | 6.62567 | **0.0100519** | 0.856478 | **0.017** |
| evergreenbroadleaf | 0.930549 | -30.8483 | 5.84101 | **0.0156568** | 0.813854 | 0.062 |
| mixedtrees | 6.91842e-05 | -60.5406 | -0.000333478 | 1 | 0.280237 | 0.499 |
| shrubs | 0.747615 | -48.4551 | 1.66896 | 0.196397 | 0.680686 | 0.1 |
| herbaceous | 1.02834 | -62.219 | 3.69357 | 0.0546227 | 0.733277 | **0.04** |
| needleleaf | 0.535352 | -57.011 | 0.435253 | 0.509422 | 0.374008 | 0.284 |
| sand | 0.840342 | -61.028 | 4.6684 | **0.0307226** | 0.728324 | **0.023** |
| silt | 0.705421 | -57.1411 | 1.25515 | 0.262572 | 0.542212 | 0.099 |

Table S7. Habitat descriptors and their associated environmental parameters. Mean and standard deviation are given for each.

| habitat | aridity.mean | aridity.sd | BIO1.mean | BIO1.sd | BIO10.mean | BIO10.sd |
| --- | --- | --- | --- | --- | --- | --- |
| 0 | 0.8070896 | 0.3134494 | 111.97727 | 71.38935 | 209.25 | 47.73083 |
| 1 | 0.8735211 | 0.1944651 | 135.53125 | 53.21042 | 219.875 | 36.34029 |
| 2 | 0.8798669 | 0.2676311 | 107.06667 | 85.63625 | 203.83333 | 54.94532 |
| 3 | 0.9404375 | 0.3307219 | 110.69048 | 46.48023 | 201.52381 | 43.0948 |
| 4 | 0.8288934 | 0.2284391 | 98.80769 | 79.81164 | 200.65385 | 49.07833 |
| 5 | 1.1326438 | 0.5507101 | 105.1 | 62.14893 | 181.6 | 46.1229 |

| habitat | BIO11.mean | BIO11.sd | BIO12.mean | BIO12.sd | BIO13.mean | BIO13.sd |
| --- | --- | --- | --- | --- | --- | --- |
| 0 | 10.431818 | 100.060969 | 905.1591 | 404.1213 | 122.54545 | 60.26744 |
| 1 | 45.3125 | 81.611657 | 1012.0312 | 268.734 | 137.875 | 67.28732 |
| 2 | 5.933333 | 122.427656 | 952.5333 | 393.8222 | 128.46667 | 61.97882 |
| 3 | 18 | 69.031515 | 987.2619 | 311.0825 | 131.11905 | 45.29429 |
| 4 | -10.307692 | 117.733551 | 867.2692 | 311.751 | 117.57692 | 43.91699 |
| 5 | 31.5 | 87.738247 | 1049.5 | 462.3726 | 138.2 | 56.47133 |

| habitat | BIO14.mean | BIO14.sd | BIO15.mean | BIO15.sd | BIO16.mean | BIO16.sd |
| --- | --- | --- | --- | --- | --- | --- |
| 0 | 40.38636 | 30.96193 | 41.61364 | 28.68712 | 330.5227 | 148.5643 |
| 1 | 44.09375 | 24.57656 | 36.34375 | 26.89034 | 376.1562 | 185.9635 |
| 2 | 42.83333 | 25.23438 | 36.23333 | 19.22969 | 344.4 | 161.047 |
| 3 | 44.42857 | 28.02824 | 36.07143 | 22.58943 | 364.8095 | 126.4893 |
| 4 | 35.23077 | 21.73861 | 39.46154 | 19.50904 | 320.8462 | 117.6521 |
| 5 | 49.8 | 37.72356 | 34.65 | 25.05222 | 377.7 | 151.0434 |

| habitat | BIO17.mean | BIO17.sd | BIO18.mean | BIO18.sd | BIO19.mean | BIO19.sd |
| --- | --- | --- | --- | --- | --- | --- |
| 0 | 137.34091 | 100.11201 | 247.8182 | 127.3218 | 179.72727 | 108.98817 |
| 1 | 150.3125 | 77.81 | 281.375 | 132.7101 | 188.6875 | 84.53261 |
| 2 | 145.96667 | 81.29169 | 290.1667 | 160.4713 | 181.4 | 85.10208 |
| 3 | 152.61905 | 85.74671 | 257.1667 | 130.793 | 232.2381 | 136.7618 |
| 4 | 121.19231 | 69.31256 | 288 | 110.9931 | 139.53846 | 87.17689 |
| 5 | 166.45 | 120.83838 | 276.35 | 159.5889 | 271.05 | 156.28045 |

| habitat | BIO2.mean | BIO2.sd | BIO3.mean | BIO3.sd | BIO4.mean | BIO4.sd |
| --- | --- | --- | --- | --- | --- | --- |
| 0 | 126.18182 | 20.26465 | 38.27273 | 11.87708 | 7698.886 | 2810.843 |
| 1 | 121.96875 | 11.99648 | 41.4375 | 13.70021 | 6702.406 | 2921.888 |
| 2 | 124.73333 | 14.31391 | 38.7 | 12.99011 | 7721.267 | 3067.692 |
| 3 | 123.64286 | 19.59984 | 39.57143 | 12.69181 | 7171.405 | 2610.777 |
| 4 | 124.15385 | 14.11616 | 36.96154 | 14.29082 | 8219.154 | 3428.805 |
| 5 | 120.1 | 28.084 | 42.1 | 10.25725 | 5796.3 | 2743.71 |

| habitat | BIO5.mean | BIO5.sd | BIO6.mean | BIO6.sd | BIO7.mean | BIO7.sd |
| --- | --- | --- | --- | --- | --- | --- |
| 0 | 286.61364 | 49.64443 | -58.34091 | 97.46213 | 345.61364 | 72.4549 |
| 1 | 294.34375 | 29.54924 | -17.625 | 82.90848 | 312.34375 | 82.58263 |
| 2 | 281.63333 | 46.04286 | -63.8 | 128.24583 | 344.43333 | 90.29275 |
| 3 | 281.28571 | 37.24398 | -47.45238 | 64.34864 | 328.28571 | 72.04227 |
| 4 | 281.07692 | 39.56474 | -83.30769 | 121.81416 | 365.34615 | 96.59546 |
| 5 | 256.15 | 43.81847 | -26.8 | 90.21154 | 284.85 | 91.62364 |

| habitat | BIO8.mean | BIO8.sd | BIO9.mean | BIO9.sd | aspect.mean | aspect.sd |
| --- | --- | --- | --- | --- | --- | --- |
| 0 | 167.06818 | 59.97267 | 63.56818 | 125.33425 | 174.25 | 25.10917 |
| 1 | 186.3125 | 66.71728 | 76.4375 | 95.66711 | 183.5 | 45.4793 |
| 2 | 158.1 | 81.14344 | 56.06667 | 121.51056 | 169.86667 | 30.41761 |
| 3 | 150.35714 | 89.5641 | 75.69048 | 90.13607 | 168.07143 | 37.60894 |
| 4 | 172.03846 | 69.81686 | 34 | 115.48936 | 156.92308 | 22.83897 |
| 5 | 116.2 | 91.94147 | 98.85 | 85.34051 | 177.25 | 30.44052 |

| habitat | elevation.mean | elevation.sd | slope.mean | slope.sd | bulkdensity.mean | bulkdensity.sd |
| --- | --- | --- | --- | --- | --- | --- |
| 0 | 630.0909 | 753.2717 | 1.181818 | 1.622355 | 1393.75 | 150.43206 |
| 1 | 502.8125 | 705.63 | 1.53125 | 2.171549 | 1408 | 95.12956 |
| 2 | 551.1333 | 635.5465 | 1.633333 | 1.45733 | 1313.66667 | 200.11485 |
| 3 | 645.6667 | 772.4148 | 1.547619 | 2.519448 | 1326.85714 | 177.21972 |
| 4 | 655 | 772.5765 | 1.230769 | 1.69085 | 1337.76923 | 161.21306 |
| 5 | 883.85 | 834.0965 | 2 | 1.545603 | 1223.95 | 153.50451 |

| habitat | claypercent.  mean | claypercent.  sd | Coarsefragment  percent.mean | Coarsefragment  percent.sd | nitrogen.  mean | Nitrogen.  sd |
| --- | --- | --- | --- | --- | --- | --- |
| 0 | 23.704545 | 8.200841 | 8.545455 | 6.068869 | 162.81818 | 70.85759 |
| 1 | 20.71875 | 7.884518 | 7.5625 | 6.241995 | 273.21875 | 331.2983 |
| 2 | 21.266667 | 8.79502 | 9.2 | 5.222889 | 213.2 | 115.41599 |
| 3 | 20.571429 | 9.211794 | 8.928571 | 7.550307 | 197.14286 | 93.48665 |
| 4 | 21.730769 | 9.040684 | 7.346154 | 5.963027 | 228.80769 | 170.13984 |
| 5 | 22.6 | 10.928556 | 12.45 | 7.281827 | 314.15 | 337.60776 |

| habitat | phx10percent.  mean | phx10percent.  sd | Sandpercent.  mean | Sandpercent.  sd | Siltpercent.  mean | Siltpercent.  sd |
| --- | --- | --- | --- | --- | --- | --- |
| 0 | 60.613636 | 6.824207 | 38.954545 | 9.327263 | 37.045455 | 8.036982 |
| 1 | 59.625 | 4.948064 | 42.6875 | 11.484591 | 35.96875 | 10.539558 |
| 2 | 58.166667 | 6.762995 | 45.966667 | 12.009619 | 33.133333 | 7.931552 |
| 3 | 59.166667 | 7.6278 | 44.357143 | 11.869228 | 35.095238 | 8.835467 |
| 4 | 60.461538 | 5.565749 | 39.961538 | 14.362076 | 37.538462 | 12.023348 |
| 5 | 59.65 | 5.990965 | 41.6 | 7.894442 | 34.85 | 5.254892 |

| habitat | carboncontent.  mean | carboncontent.  sd | needleleaf.  mean | needleleaf.  sd | evergreeen  broadleaf.mean | evergreeen  broadleaf.sd |
| --- | --- | --- | --- | --- | --- | --- |
| 0 | 39.52273 | 22.53382 | 8.386364 | 13.501263 | 1.8181818 | 8.5280287 |
| 1 | 44.9375 | 26.44546 | 6.8125 | 7.352721 | 1.21875 | 4.3587795 |
| 2 | 58.5 | 42.64387 | 13.033333 | 11.639629 | 5.5 | 14.9534994 |
| 3 | 49.66667 | 32.90415 | 11.285714 | 17.41592 | 1.5952381 | 6.2602297 |
| 4 | 50.96154 | 23.38666 | 9.615385 | 15.703176 | 0.5384615 | 1.9414507 |
| 5 | 60 | 34.57922 | 16.75 | 17.548742 | 0 | 0 |

| habitat | Deciduous  broadleaf.mean | Deciduous  broadleaf.sd | mixedtrees.  mean | mixedtrees.  sd | shrubs.  mean | shrubs.  sd |
| --- | --- | --- | --- | --- | --- | --- |
| 0 | 5.636364 | 9.15239 | 18.59091 | 14.40125 | 2.636364 | 8.109638 |
| 1 | 10.5625 | 18.851061 | 18.65625 | 13.6915 | 1.03125 | 4.125 |
| 2 | 5.933333 | 13.578958 | 18.66667 | 10.11482 | 2.866667 | 7.327703 |
| 3 | 5.571429 | 10.191032 | 16.21429 | 14.44349 | 2.785714 | 7.788728 |
| 4 | 4.153846 | 6.905266 | 17.11538 | 16.71969 | 1.538462 | 5.547002 |
| 5 | 3.1 | 6.0452 | 20.45 | 19.40425 | 2.85 | 6.037153 |

| habitat | herbaceous.  mean | herbaceous.  sd |
| --- | --- | --- |
| 0 | 7.727273 | 9.903976 |
| 1 | 7.25 | 7.786741 |
| 2 | 7.633333 | 16.933132 |
| 3 | 6.666667 | 13.268697 |
| 4 | 8.5 | 8.34416 |
| 5 | 6.95 | 7.432848 |

FIGURES

Figure S1. Dated phylogeny using MCMCTree using 353 nuclear loci and fossil constrains (Dahal et al., 2025). The x-axis represents time in millions of years.

Figure S2. Linear discriminant analysis (LDA) of the representative taxa of *S.* subg. *Virgulus*. (**A**) morphological data and (**B**) environmental data.

Figure S3A. Boxplots of morphological measurements that best distinguish each representative taxon of *S*. section *Concolores*.

Figure S3B. Boxplots of morphological measurements that best distinguish each representative taxon of *S*. section *Grandiflori*.

Figure S3C. Boxplots of morphological measurements that best distinguish each representative taxon of *S*. section *Patenetes*.

Figure S3D. Boxplots of morphological measurements that best distinguish each representative taxon of *S*. section *Polyliguli* and *S*. section *Ericoidei.*


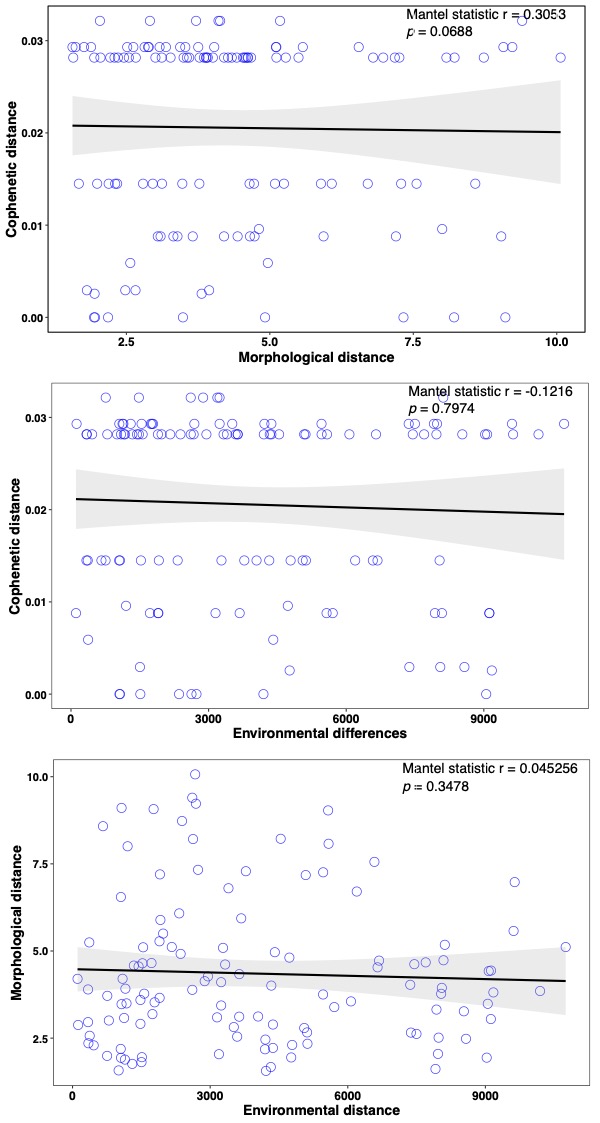


Figure S4. The pairwise plots of Mantel tests indicate lack of correlation between (**A**) phylogenetic and morphological distances, (**B**) environmental and phylogenetic distances and (**C**) morphological and environmental distances.
